# Supplementary material for: Omic Approach in Non-smoker Female with Lung Squamous Cell Carcinoma Pinpoints to Germline Susceptibility and Personalized Medicine
Source: PubMed Central journal article supplement — Cancer Res Treat. 2017 May 26;50(2):356–65. doi: 10.4143/crt.2017.125 (PMC5912139; doi:10.4143/crt.2017.125), 2017-05-26
Supplement: crt-2017-125-suppl2.pdf [file crt-2017-125-suppl2.pdf]

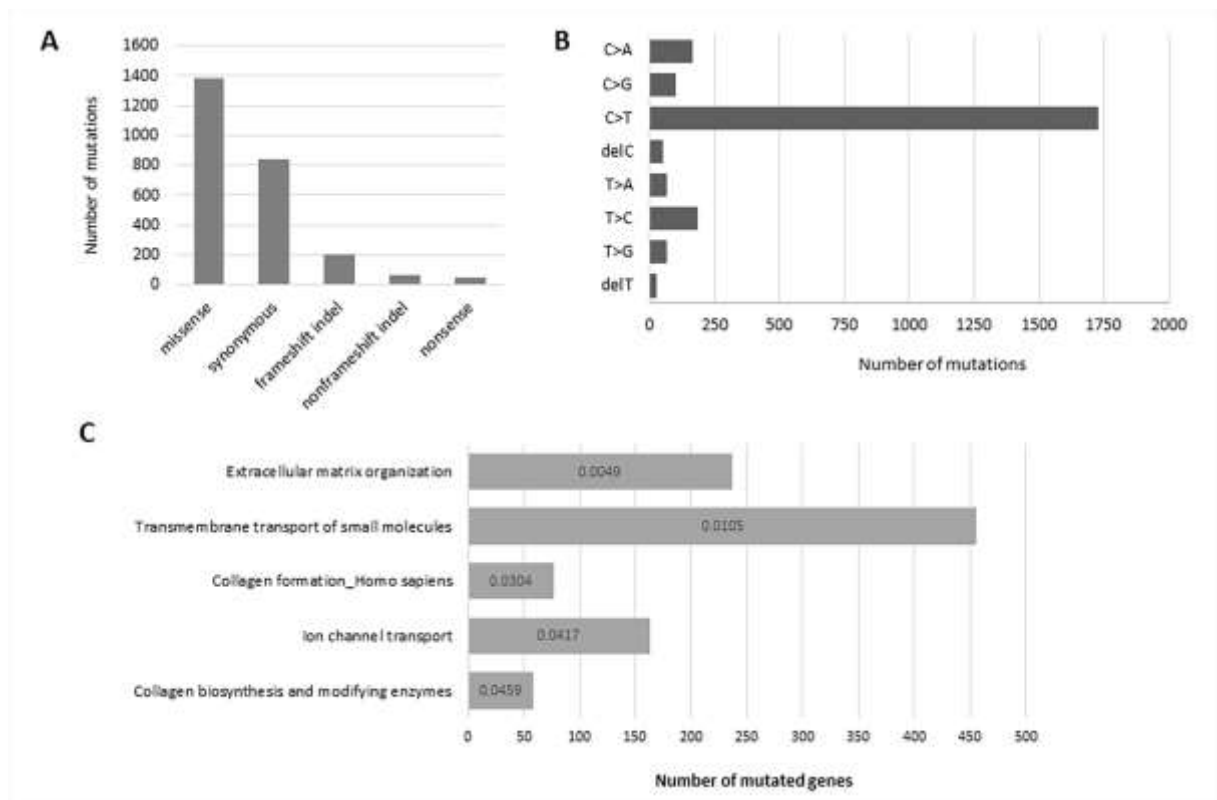

**S2 Fig.** Mutation spectra of squamous cell carcinoma cancer. (A) Prevalence of somatic mutations. (B) Frequency of the eight possible base pair substitutions/deletion. (C) Results of pathway analysis of mutated genes in lung tumoral tissue. Pathways sorted from smallest to largest p-value (indicated within the bars).
