# Supplementary material for: Omic Approach in Non-smoker Female with Lung Squamous Cell Carcinoma Pinpoints to Germline Susceptibility and Personalized Medicine
Source: PubMed Central journal article supplement — Cancer Res Treat. 2017 May 26;50(2):356–65. doi: 10.4143/crt.2017.125 (PMC5912139; doi:10.4143/crt.2017.125), 2017-05-26
Supplement: crt-2017-125-suppl4.pdf [file crt-2017-125-suppl4.pdf]

**S4 Table.** Dull genetic data of 19 cancer-related germline rare variants identified by whole-exome sequencing.

| Gene          | Chr   | Start     | End       | Ref | Alt       | Mutation             | Accession number | Exon   | Nucleotide change          | Amino acid change |
|---------------|-------|-----------|-----------|-----|-----------|----------------------|------------------|--------|----------------------------|-------------------|
| <i>ACACA</i>  | chr17 | 35605011  | 35605011  | G   | A         | Nonsynonymous        | NM_198837        | Exon16 | c.C1948T                   | p.R650W           |
| <i>ATP2C1</i> | chr3  | 130712791 | 130712791 | G   | A         | Nonsynonymous        | NM_001199182     | Exon20 | c.G1891A                   | p.G631S           |
| <i>AVL9</i>   | chr7  | 32535358  | 32535359  | CG  | -         | Frameshift deletion  | NM_015060        | Exon1  | c.37_38del                 | p.R13fs           |
| <i>CARS</i>   | chr11 | 3050233   | 3050233   | C   | T         | Nonsynonymous        | NM_001751        | Exon8  | c.G775A                    | p.G259S           |
| <i>CRYGD</i>  | chr2  | 208988920 | 208988920 | G   | C         | Stopgain             | NM_006891        | Exon2  | c.C168G                    | p.Y56X            |
| <i>CTBP2</i>  | chr10 | 126686569 | 126686569 | G   | A         | Nonsynonymous        | NM_022802        | Exon4  | c.C2149T                   | p.R717C           |
| <i>CTSZ</i>   | chr20 | 57576649  | 57576649  | C   | T         | Nonsynonymous        | NM_001336        | Exon3  | c.G358A                    | p.V120M           |
| <i>DEPTOR</i> | chr8  | 121019052 | 121019052 | A   | T         | Stopgain             | NM_001283012     | Exon5  | c.A631T                    | p.R211X           |
| <i>ENO3</i>   | chr17 | 4858805   | 4858805   | C   | G         | Stopgain             | NM_001193503     | Exon6  | c.C642G                    | p.Y214X           |
| <i>FOXMI</i>  | chr12 | 2968078   | 2968078   | G   | A         | Nonsynonymous        | NM_001243088     | Exon8  | c.C1973T                   | p.P658L           |
| <i>GPRC6A</i> | chr6  | 117128308 | 117128308 | C   | T         | Nonsynonymous        | NM_001286354     | Exon3  | c.G560A                    | p.R187Q           |
| <i>LRP2</i>   | chr2  | 170042245 | 170042245 | T   | C         | Nonsynonymous        | NM_004525        | Exon50 | c.A9613G                   | p.N3205D          |
| <i>MYH9</i>   | chr22 | 36697683  | 36697683  | T   | G         | Nonsynonymous        | NM_002473        | Exon21 | c.A2528C                   | p.Q843P           |
| <i>PARP14</i> | chr3  | 122419160 | 122419160 | -   | AAGC-AGAA | Frameshift insertion | NM_017554        | Exon6  | c.1759_1760ins<br>AAGCAGAA | p.E587fs          |
| <i>PHF12</i>  | chr17 | 27254016  | 27254016  | C   | T         | Nonsynonymous        | NM_001033561     | Exon3  | c.G314A                    | p.R105H           |
| <i>PRMT2</i>  | chr21 | 48078714  | 48078714  | G   | A         | Nonsynonymous        | NM_001242866     | Exon7  | c.G712A                    | p.G238R           |
| <i>PSCA</i>   | chr8  | 143763531 | 143763531 | G   | A         | Stopgain             | NM_005672        | Exon3  | c.G326A                    | p.W109X           |
| <i>SDF2L1</i> | chr22 | 21998280  | 21998280  | G   | A         | Nonsynonymous        | NM_022044        | Exon3  | c.G482A                    | p.R161H           |
| <i>TPPP3</i>  | chr16 | 67424196  | 67424196  | G   | A         | Nonsynonymous        | NM_015964        | Exon4  | c.C412T                    | p.R138C           |
